## **Knockout of $\alpha\beta$ but not $\gamma\delta$ T cells in chickens is associated with high cytotoxicity and deficiency of regulatory and helper T cells**

Theresa von Heyl<sup>1</sup>, Romina Klinger<sup>1</sup>, Dorothea Aumann<sup>1</sup>, Christian Zenner<sup>2</sup>, Mohammed Alhussien<sup>1</sup>, Antonina Schlickerrieder<sup>1</sup>, Kamila Lengyel<sup>1</sup>, Hanna-Kaisa Vikkula<sup>1</sup>, Teresa Mittermair<sup>1</sup>, Hicham Sid<sup>1</sup>, Benjamin Schusser<sup>1\*</sup>

<sup>1</sup>*Reproductive Biotechnology, TUM School of Life Sciences, Technische Universität München, 85354 Freising, Germany*

<sup>2</sup>*Intestinal Microbiome, TUM School of Life Sciences, Technische Universität München, 85354 Freising, Germany*

\*Corresponding author:  
Benjamin Schusser  
[Benjamin.schusser@tum.de](mailto:Benjamin.schusser@tum.de)

Keywords: T cells, chicken, adaptive immune system, genetically modified animals, CRISPR/Cas9

## **Significance statement**

The lack of genetically modified chickens has severely limited research in avian immunology compared to other animal models. Here, we report the generation of two T cell knockout chicken lines that will contribute significantly to the understanding of T cell biology as a very important research model as well as an important livestock species. The generated animals reveal the function of different T cell populations in chickens and will help to better understand the role of these cells during the interaction with various pathogens in birds.

## **Abstract**

The availability of genetically modified mice has facilitated the study of mammalian T cells. No model has yet been developed to study these cells in chicken, an important livestock species with a high availability of  $\gamma\delta$  T cells. To investigate the role of  $\gamma\delta$  and  $\alpha\beta$  T cell populations in birds, we generated chickens lacking these T cell populations. This was achieved by genomic deletion of the constant region of the T cell receptor  $\gamma$  or  $\beta$  chain, leading to a complete loss of either  $\gamma\delta$  or  $\alpha\beta$  T cells. Our results show that a deletion of  $\alpha\beta$  T cells but not  $\gamma\delta$  T cells resulted in a severe phenotype in knockout chickens. The  $\alpha\beta$  T cell knockout chickens exhibited granulomas associated with inflammation of the spleen and the proventriculus. Immunophenotyping of  $\alpha\beta$  T cell knockout chickens revealed a significant increase in monocytes and the absence of  $CD4^+$  T cells and FoxP3<sup>+</sup> regulatory T cells compared to wild type chickens. In addition, we observed a significant decrease in immunoglobulins, B lymphocytes, and changes in the bursa morphology. Our data reveal the consequences of T cell knockouts in chickens and provide new insights into their function in vertebrates.

## **Introduction**

T lymphocytes can recognize a variety of peptides to facilitate the humoral and cytotoxic immune responses and are greatly involved in variable processes including inflammatory and autoimmune diseases. They are characterized by their heterodimeric T cell receptor (TCR), which consists of a constant and a variable region with either  $\alpha\beta$  or  $\gamma\delta$  chains. Therefore T lymphocytes are divided into two major subgroups, the  $\alpha\beta$  and  $\gamma\delta$  T cells (1). The role of these cells has been largely studied in humans and mammalian animal models including mice, which harbor a comparatively low percentage of peripheral blood  $\gamma\delta$  T cells (2). In contrast, chickens harbor a high percentage of  $\gamma\delta$  T cells, which makes them an intriguing research model.

$\gamma\delta$  T cells in chickens are known for their cytotoxic activity (3), and high availability in the peripheral epithelial tissue (5). The function of  $\alpha\beta$  T cells is defined by the two co-receptors CD4 and CD8. The  $CD4^+$   $\alpha\beta$  T cells are activated through antigens bound to major histocompatibility complex (MHC) II molecules, leading to a humoral immune response against pathogens (6). Regulatory T cells ( $T_{regs}$ ), typically expressing  $CD4^+CD25^+$  and the transcription factor FoxP3<sup>+</sup> (7), play an important role in maintaining immune tolerance (8).  $CD8^+$   $\alpha\beta$  T cells recognize peptides presented by MHC I molecules (9) and show cytotoxic activity (6). Similar to other species, chicken  $CD8^+$  T cells have two isoforms, composed of a  $CD8\alpha\alpha$  homodimer or a  $CD8\alpha\beta$  heterodimer. They can further be divided into  $CD8^{+high}$ ,  $CD8^{+dim}$ , and  $CD8^{-neg}$

populations, which were shown to respond differently to pathogens such as salmonella (4).

Due to the unavailability of genetically modified avian models, early research was based on thymectomy combined with monoclonal antibody injections to investigate chicken T cell biology, which can be associated with significant alterations of the immune system (10). Using this method it was not possible to define T cell functions since the frequency of epithelium-associated  $\gamma\delta$  T cells (TCR1) as well as  $V\beta 1^+$   $\alpha\beta$  T cells (TCR2) cells were not affected (10). More recently, the generation of recombination activating gene 1 (RAG1) knockout (KO) chickens led to the loss of both B and T cell populations (11) which helped in understanding the role of this gene in chicken lymphocyte development, but it did not allow a separate study of distinct immune cell populations.

The establishment of a reverse genetic system in chickens allowed the generation of a KO of the B cell receptor (BCR) using the genetic modification of primordial germ cells (PGCs) (12, 13). Not only the use of PGCs but also the availability of the Clustered Regularly Interspaced Short Palindromic Repeats (CRISPR)/Cas9 technology has facilitated the generation of genetically edited chickens and simplified the gene editing process (14). To define specific T cell populations' functions, such as  $\alpha\beta$  T cells and  $\gamma\delta$  T cells, genetically modified chicken lines lacking these populations are pivotal.

In this study, we successfully generated both TCR  $C\gamma^{-/-}$  and TCR  $C\beta^{-/-}$  chickens, lacking  $\gamma\delta$  or  $\alpha\beta$  T cells, respectively. TCR  $C\beta^{-/-}$  chickens exhibited a severe phenotype that resulted in inflammation in the spleen, proventriculus, and skin associated with structural deterioration of the thymus and bursa of Fabricius as early as 14 days after hatch, while no adverse phenotype was observed in TCR  $C\gamma^{-/-}$  chickens. The observed phenotype in TCR  $C\beta^{-/-}$  indicates an autoimmune condition caused by the loss of  $CD4^+$  helper T cells and  $FoxP3^+$  regulatory T cells.

## **Results**

### **Deletion of the T Cell receptor $\beta$ and $\gamma$ constant chains**

Chickens lacking either  $\gamma\delta$  or  $\alpha\beta$  T cells were generated by targeting the  $\gamma$  or respectively  $\beta$  constant region of the corresponding TCR. CRISPR/Cas9 mediated homology-directed repair (HDR) was used in chicken PGCs to replace the constant region by a selectable marker cassette (Fig. 1A,B). Precise targeting was confirmed by knockout allele-specific PCR and correctly targeted clonal PGC lines were used to generate TCR  $C\gamma^{+/-}$  (germline transmission rate = 5.3%) and TCR  $C\beta^{+/-}$  (germline transmission rate = 1.5%) animals (Fig. S1A). To remove the selectable marker cassette, PGCs were re-derived from these lines and electroporated with Cre recombinase to remove the selectable marker cassette. eGFP<sup>neg</sup> PGCs were sorted by FACS and injected into embryos to finally generate TCR  $C\gamma^{+/-}$  (germline transmission rate = 9%) and TCR  $C\beta^{+/-}$  (germline transmission rate = 5,9%) chickens that do not express eGFP (Fig. 1A,B; Fig. S1A). Knockout and wild type allele-specific PCRs were established to detect TCR  $C\gamma^{-/-}$  and TCR  $C\beta^{-/-}$  chickens (Fig. 1C,D).

### **TCR $C\gamma^{-/-}$ and TCR $C\beta^{-/-}$ chickens lack either $\gamma\delta$ or $\alpha\beta$ T cells**

The immunophenotype of the generated T cell knockout chicken was analyzed via flow cytometry. TCR  $C\gamma^{-/-}$  chickens showed a complete depletion of  $\gamma\delta$  T cells and TCR  $C\beta^{-/-}$  chickens a complete depletion of  $\alpha\beta$  T cells. Simultaneous staining for the pan T cell antigen CD3 confirmed the successful knockout and revealed that no uncharacterized T cell population exists in chickens (Fig. 2A,B). While TCR  $C\gamma^{-/-}$  chickens are phenotypically similar to wild type animals, TCR  $C\beta^{-/-}$  chickens develop a severe phenotype as early as two weeks post hatch. Macroscopic lesions like epithelial granulomas at the comb, beak, and legs associated with inflammation in the mucosal surface of the proventriculus (Fig. S1D) and the spleen (Fig. 4A) were seen. To investigate whether the phenotype was caused to environmental pathogens or autoimmune factors, biopsy samples from the spleen of two-week-old TCR  $C\beta^{-/-}$  animals and wild type animals were cultivated for bacterial detection. No bacterial growth was observed, confirming that the phenotype was not related by environmental infection (Data not shown). Neither TCR  $C\gamma^{-/-}$  nor TCR  $C\beta^{-/-}$  chickens showed impaired weights compared to their wild type siblings (Fig. S1B,C).

### **The absence of $\gamma\delta$ T cells is compensated through CD8<sup>+</sup> $\alpha\beta$ T cells in the gut**

Analysis of peripheral blood mononuclear cells (PBMCs) in TCR  $C\gamma^{-/-}$  chickens showed, that the loss of  $\gamma\delta$  T cells does not influence other blood circulating T cell subpopulations, B cells, or monocytes between seven- and 49 days post-hatch. However, a significantly higher number of  $V\beta 1^{+}$   $\alpha\beta$  T cells was found in the spleen after one and 16 weeks ( $p < 0.05$ ). Within these, the CD8<sup>+</sup> T cells in both isotypes CD8 $\alpha\beta^{+}$  and CD8 $\alpha\alpha^{+}$  were increased. In the caecum, significantly higher number of CD8 $\alpha\beta^{+}$   $V\beta 2^{+}$   $\alpha\beta$  T cells was found seven days post hatch, and a significantly higher number of CD8<sup>+</sup>  $V\beta 1^{+}$   $\alpha\beta$  T cells was found after 16 weeks ( $p < 0.05$ ). In the cecal tonsils, significantly more CD4<sup>+</sup>  $V\beta 1^{+}$   $\alpha\beta$  T cells were detected ( $p < 0.05$ ) after one week. However, after three weeks the CD8 $\alpha\beta^{+}$   $V\beta 1^{+}$   $\alpha\beta$  T cells were increased ( $p < 0.05$ ), and after 16 weeks both isotypes CD8 $\alpha\alpha^{+}$  and CD8 $\alpha\beta^{+}$  from  $V\beta 1^{+}$   $\alpha\beta$  T cells were increased ( $p < 0.05$ ). In the thymus, the  $V\beta 1^{+}$   $\alpha\beta$  T cells were decreased ( $p < 0.05$ ), and the CD8 $\alpha\alpha^{+}$   $V\beta 2^{+}$   $\alpha\beta$  T cells were increased ( $p < 0.05$ ) after 16 weeks (Fig. 2C). The intestinal integrity was examined by morphometric analysis of histological sections including the length of the tunica muscularis, crypts, and villi in the duodenum, jejunum, ileum, and caecum of TCR  $C\gamma^{-/-}$  animals compared to wild type birds. No significant differences were found between both groups ( $p > 0.05$ ) (Fig. S6).

### **TCR $C\beta^{-/-}$ chickens show an increase in monocytes and a decrease in B cells**

In the TCR  $C\beta^{-/-}$  chicken no compensatory effect of the  $\gamma\delta$  T cells was detected. 14 days after hatch significantly fewer B cells, CD4<sup>+</sup>, and CD8<sup>+</sup> T cells were detected ( $p < 0.05$ ) along with significantly increased numbers of monocytes of TCR  $C\beta^{-/-}$  chicken ( $p < 0.05$ ) (Fig. 3A). The number of blood circulating  $\gamma\delta$  T cells was significantly lower in double positive CD8<sup>dim</sup> CD4<sup>+</sup> cells, one week after hatch ( $p < 0.05$ ). On the other side, levels of both CD8<sup>high</sup> and CD8<sup>dim</sup> cells within the  $\gamma\delta$  T cells were significantly higher after seven and 15 days post-hatch (Fig. 3B). Additionally, immunoglobulin levels in the plasma of 14 day-old TCR  $C\beta^{-/-}$  chickens were decreased compared to wild type chickens while no differences between TCR  $C\gamma^{-/-}$  and wild type chickens were observed (Fig. S2).

### **TCR $C\beta^{-/-}$ knockout impacts the development of lymphatic organs**

The thymus in wild type chickens showed a clear separation in cortex and medulla. No such separation was found in TCR C $\beta$ <sup>-/-</sup> chickens (Fig. 4A). The spleen of TCR C $\beta$ <sup>-/-</sup> chickens showed inflammatory lesions (Fig. 4A). Surprisingly, a strong phenotype was observed in the bursa of Fabricius in TCR C $\beta$ <sup>-/-</sup> chickens, where B cell follicles appeared underdeveloped in comparison to wild type siblings (Fig. 4A). Immunohistochemistry of the epithelial granulomas 14 days after hatch showed infiltration of the surrounding tissue by macrophages and a central granulocyte accumulation, surrounded with B cells and  $\gamma\delta$  T cells (Fig. 4B). Splenic immunofluorescence staining of B cells, CD4<sup>+</sup>, and CD8<sup>+</sup> T cells revealed the absence of germinal center formations and CD4<sup>+</sup> T cells in TCR C $\beta$ <sup>-/-</sup> animals, which was not the case in wild type birds. In addition, TCR C $\beta$ <sup>-/-</sup> chickens exhibited a random splenic distribution of B cells and a few CD8<sup>+</sup> T cells, while typical white pulp formation of B cells surrounded by CD8<sup>+</sup> T cells was found in wild type animals (Fig. S3).

### **FoxP3<sup>+</sup> expression of T<sub>reg</sub> cells is significantly lower in TCR C $\beta$ <sup>-/-</sup> knockout chicken**

The expression of several immune-related genes was compared between wild type, TCR C $\beta$ <sup>-/-</sup> and TCR C $\gamma$ <sup>-/-</sup> chickens, 14 days after hatch. Significantly lower TGF $\beta$  and IL-5 expression was found in the spleen ( $p < 0.05$ ), while significantly higher IL-6 levels were detected in the thymus of TCR C $\beta$ <sup>-/-</sup> animals ( $p < 0.05$ ). In addition, a significantly increased IL-1 $\beta$  expression was detected in PBMCs of TCR C $\beta$ <sup>-/-</sup> animals ( $p < 0.05$ ). IL-22 expression was significantly lower in the spleen of TCR C $\beta$ <sup>-/-</sup> chickens, while it was significantly higher in the spleen of TCR C $\gamma$ <sup>-/-</sup> chickens ( $p < 0.05$ ). Following the significantly decreased CD4<sup>+</sup> T cell population FoxP3 expression was significantly lower in the spleen, thymus, and PBMCs in TCR C $\beta$ <sup>-/-</sup> animals ( $p < 0.05$ ) (Fig. S4).

### **The gut microbiome of TCR C $\beta$ <sup>-/-</sup> chickens shows a significantly different beta diversity**

To analyze the influence of T cells in the chicken gut microbiome, 16S RNA sequencing of feces and caecum content was performed. Significant differences in the number of species were found in the feces of 14-day-old TCR C $\beta$ <sup>-/-</sup> chickens as well as in the caecum of 35-day-old TCR C $\gamma$ <sup>-/-</sup> chickens ( $p < 0.05$ ). There were no differences in the Shannon effective counts ( $p > 0.05$ ). Analyzing the beta diversity of both fecal and cecal samples of TCR C $\beta$ <sup>-/-</sup> chickens demonstrated significantly different populations compared to wild type chickens ( $p < 0.05$ ). In the caecum content of 14-day-old TCR C $\beta$ <sup>-/-</sup> chickens, significantly fewer bacteria of the class Clostridia were found, while in the feces, significantly fewer Actinobacteria and significantly more Clostridia were detected at the class level ( $p < 0.05$ ) (Fig. S5).

### **Discussion:**

T cells play a crucial role in regulating various physiological functions and providing defense against pathogens in humans and other mammals (1). However, the role of each subpopulation in chickens remains unclear due to the lack of investigative tools such as genetically engineered chickens in the past. This study was carried out to characterize the functions of different T cell subpopulations by generating chickens that lack  $\gamma\delta$  T cells (TCR C $\gamma$ <sup>-/-</sup>) and those that lack  $\alpha\beta$  T cells (TCR C $\beta$ <sup>-/-</sup>). The successful generation and detailed characterization of these lines showed that the

loss of  $\gamma\delta$  T cells in TCR  $C\gamma^{-/-}$  chicken was asymptomatic, while the TCR  $C\beta^{-/-}$  chickens exhibited a severe phenotype.

It is widely believed that  $\gamma\delta$  T cells play a central role in mediating various functions of the immune system in chickens since they harbor a high number of  $\gamma\delta$  T cells with up to 50% in blood (5, 12). Surprisingly, the TCR  $C\gamma^{-/-}$  chickens did not display major phenotypic differences compared to wild type chickens. In mice, a significant population of  $\gamma\delta$  T cells is present in the intestine and plays an important role in maintaining intestinal integrity (15). Contrary to expectations no differences were recorded in the morphometry of the intestine in the TCR  $C\gamma^{-/-}$  compared to wild type chickens. It is well established that the majority of  $\gamma\delta$  T cells in chickens are  $CD8^+$  T cells (4). In TCR  $C\gamma^{-/-}$  chickens the  $CD8^+$   $\alpha\beta$  T cells population is significantly increased in the caecum, spleen, and cecal tonsils. Concluding that this  $CD8^+$   $\alpha\beta$  T cell population compensates for the absence of the  $\gamma\delta$  T cells in the gut and therefore, maintains intestinal integrity in TCR  $C\gamma^{-/-}$  chickens. This phenomenon is also supported by the findings of Sandrock et al. (2018), who reported that  $\gamma\delta$  T cell-deficient mice show mild phenotypes and that other lymphocytes take over the functions of  $\gamma\delta$  T cells in the absence of these cells (16).

The TCR  $C\beta^{-/-}$  chicken developed a pathological phenotype around two weeks of age. To determine if the observed phenotype is caused by a microbial infection, the spleens of 14-day-old TCR  $C\beta^{-/-}$  and wild type chickens were cultured to check for bacterial growth, but no bacteria were detected after a week of cultivation. The findings of this study indicate that the severe phenotype of the TCR  $C\beta^{-/-}$  is caused autoimmune due to an imbalance of humoral and cytotoxic responses and the loss of  $CD4^+$  T cells and  $T_{reg}$  cells. This phenotype was not in agreement with Cihak et. al. (1993) who reported depletion of T cell subsets after thymectomy and antibody injections without a pronounced phenotype. The method employed by Cihak et. al. was deemed inefficient, as the combination of TCR2 antibody treatment and thymectomy led to an increase of  $TCR3^+$  cells, thus demonstrating the inability to effectively eliminate T cells completely (10). Later research showed, that mice with  $TCR\alpha^{-/-}$  KO also develop an inflammation of the stomach (17). Likewise, severe combined immunodeficiency (SCID) mice and RAG1 deficient chicken show similar phenotypes to the TCR  $C\beta^{-/-}$  chickens. Even though in SCID mice and Rag-1 deficient chickens it is suggested that the severe phenotype appears through the loss of both B- and T cells (11, 18), we showed in this study, that the phenotype in chickens appears only because of the loss of  $\alpha\beta$  T cells. Also, chickens lacking B cells (12) and TCR  $C\gamma^{-/-}$  chickens do not show this phenotype, underlining that only the missing  $\alpha\beta$  T cells are leading to this severe phenotype.

The significant decrease in  $CD4^+$  T cells in the PBMCs of TCR  $C\beta^{-/-}$  chicken is one of the key findings to explain the severe pathology of this phenotype.  $CD4^+$  T cells secrete anti-inflammatory cytokines to coordinate the functions of other immune cells, primarily B cells, macrophages, and cytotoxic T cells (9, 19). This helps to prevent an overactive immune response that can result in autoimmune diseases (20). Indeed, the TCR  $C\beta^{-/-}$  chickens showed a reduction in the expression of IL-4, and IL-5, a significant decrease of B cells and a concurrent reduction of IgY, IgM, and IgA compared to wild type chickens. These observations may be attributed to the absence of  $CD4^+$  T cells, as the secretion of IL-4 and IL-5 controls the activation and proliferation of B cells and therefore the production of immunoglobulins (16).

The lower IL-22 mRNA expression especially in spleen of TCR C $\beta$ <sup>-/-</sup> chickens compared to wild type chickens can be explained by the fact that CD4<sup>+</sup> T cells are a major source of IL-22 in chickens (21). IL-22 plays a critical role in enhancing the innate immunity of tissues and facilitating repair and healing mechanisms during inflammation, which is essential for restoring tissue homeostasis and preventing autoimmune diseases (22). This could also contribute to the phenotype observed in TCR C $\beta$ <sup>-/-</sup> chickens.

Moreover, the significantly lower expression of FoxP3 and TGF $\beta$  in TCR C $\beta$ <sup>-/-</sup> chickens matches the absence of CD4<sup>+</sup> T cells and also indicates the loss of T<sub>reg</sub> cells. IL-10 and TGF $\beta$  secreted by T<sub>reg</sub> cells have anti-inflammatory and immunosuppressive effects, inhibiting the activation and function of CD8<sup>+</sup> T cells and monocytes, which are involved in the cytotoxic response (7). In the TCR C $\beta$ <sup>-/-</sup> chicken the regulation of cytotoxic activity of  $\gamma\delta$  T cells and macrophages is therefore disrupted.

In total fewer CD8<sup>+</sup> T cells were found in the PBMCs of the TCR C $\beta$ <sup>-/-</sup> chickens. But within the TCR1 subsets, both CD8<sup>high</sup> and CD8<sup>dim</sup> T cells were significantly increased. Whereas after infection with *Salmonella enterica*, the CD8<sup>high</sup> TCR1<sup>+</sup> population increases while the CD8<sup>dim</sup> TCR1<sup>+</sup> subset decreases (4). In TCR C $\beta$ <sup>-/-</sup> chicken the majority of TCR1<sup>+</sup> T cells are CD8<sup>+</sup> (23), leading to a disbalance of the cytotoxic and humoral response and therefore higher levels of both CD8<sup>high</sup> and CD8<sup>dim</sup> T cells. Interestingly, even though it has been described, that double-positive CD8<sup>+</sup>CD4<sup>+</sup> T cells are increasing in autoimmune diseases, for example, thyroiditis (24), in the TCR C $\beta$ <sup>-/-</sup> chickens fewer double-positive T cells were seen. It is still open to investigate whether this is related to the loss of CD4<sup>+</sup> T cells in general. The increase in the monocyte population and the higher expression of T cell-related proinflammatory cytokines such as IL-1 $\beta$ , IL-6, and TNF- $\alpha$  can be explained by the lower expression of TGF $\beta$  and FoxP3 in TCR C $\beta$ <sup>-/-</sup> chickens. The higher levels of monocytes in TCR C $\beta$ <sup>-/-</sup> chickens are associated with inflammation in the spleen and gut, and the infiltration of macrophages into epithelial tissue, leading to the formation of granulomas which occur when the immune system is unable to effectively eliminate persistent antigens (19).

In the TCR C $\beta$ <sup>-/-</sup> chicken line there is no division between the cortex and medulla of the thymus visible. During maturation, T cells migrate from the cortex into the medulla (25). Whereas  $\alpha\beta$  T cells need several days to migrate,  $\gamma\delta$  T cells migrate much faster. This is why Bucy et.al. suggest, that  $\gamma\delta$  T cells do not undergo the same selection process as  $\alpha\beta$  T cells (26). Our findings indicate that either the  $\gamma\delta$  T cells do not need the cortex for the maturation process or the  $\alpha\beta$  T cells are responsible for the separation of the thymus and therefore the  $\gamma\delta$  T cells cannot mature. Also, we found that the bursa development is impacted by the knockout because smaller B cell follicles are found in the TCR C $\beta$ <sup>-/-</sup> chickens. Whether this effect is caused by the loss of CD4<sup>+</sup> T cells, needs to be further investigated. The avian spleen serves as the primary site for interaction between CD4<sup>+</sup> T cells and B cells, where after antigenic stimulation, B cells give rise to germinal centers (23). The presence of  $\alpha\beta$  T cells is necessary for this process, although reports of spontaneous germinal center formation in TCR $\alpha$ <sup>-/-</sup> mice have been documented. Conversely, in TCR $\beta$ <sup>-/-</sup> mice germinal center formation was absent (21), a phenomenon also observed in the spleens of TCR C $\beta$ <sup>-/-</sup> chickens in the current study.

The gut-associated lymphatic tissue (GALT) is an important part of the chicken immune system. It has been shown that leukocytes can be regulated by the microbiome of the chicken (27). Herewith it was shown that also the missing  $\alpha\beta$  T lymphocytes can influence the microbiome, as we found significant differences in the microbiome of TCR  $C\beta^{-/-}$  chicken compared to their wild type siblings. In TCR $\alpha^{-/-}$  mice it was shown, that only specific pathogen free housed KO mice develop colitis, but not germ-free mice, concluding that a microbial agent activates the immune system to cause a spontaneous autoimmune reaction (17). This can also explain the inflammation in the stomach of the TCR  $C\beta^{-/-}$  chicken.

The results showed that the knockout of  $\gamma\delta$  T cells does not result in a pronounced phenotype, whereas the knockout of  $\alpha\beta$  T cells leads to a severe phenotype including granulomas on comb, leg and beak, inflammations of the spleen and the proventriculus, and impaired B cell function and immunoglobulin production due to the loss of  $CD4^{+}$  T cells including  $T_{reg}$  cells. These findings highlight the crucial role of  $\alpha\beta$  T cells in regulating the immune response and demonstrate their importance in the chicken immune system. These genetically modified chickens will serve as a tool to study the nature and function of T cell subpopulations in detail by performing various infection experiments. Understanding the distinct functions of  $\gamma\delta$  and  $\alpha\beta$  T cells in chickens will help to improve our knowledge of the chicken's immune system and to develop new strategies for controlling diseases in chickens by targeting specific components of the immune system. Additionally, these genetically modified chicken lines provide a model for understanding the functions of T cells in other species, including humans, which can deepen our understanding of the evolution of the immune system and its role in protecting against pathogens.

## **Materials & Methods**

### **Animals:**

White Leghorn (Lohmann selected White Leghorn (LSL), Lohmann-Tierzucht GmbH, Cuxhaven, Germany) chickens were used. Animal experiments were approved by the government of Upper Bavaria, Germany (ROB-55.2-2532.Vet\_02-17-101 & 55.2-1-54-2532-104-2015). Experiments were performed according to the German Welfare Act and European Union Normative for Care and Use of Experimental Animals. All animals received a commercial standard diet and water *ad libitum*. Genetically modified animals were generated as previously described (12). Shortly, PGCs, with the desired genetic modification, were injected into the vasculature of 65 h old embryos transferred into a turkey surrogate eggshell, and incubated until the hatch of chimeric roosters. Upon sexual maturity, sperm was collected for DNA isolation and genotyping. The germline-positive roosters were bred with wild type hens, first to obtain heterozygous animals, and then siblings were bred together to obtain homozygous animals.

### **Genotyping assays:**

For the TCR  $C\beta^{-/-}$  chickens' primers were designed to detect the TCR  $C\beta^{-/-}$  knockout: Forward: 5' GGTTGCAAATGACCGACCAAGC 3'; Reverse: 5' GGCTTGCACTCAGCTCTATAG 3'. A second primer pair was used to detect the TCR  $C\beta$  wild type allele: Forward: 5' GGTTGCAAATGACCGACCAAGC 3'; Reverse: 5' CACACCATTACCTTCCAGAC 3'. FIREPoI Multiplex DNA Polymerase Mastermix (Solis Biodyne, Tartu, Estonia) was used according to manufactures instructions with an annealing temperature of  $T_m$  58°C.



For the TCR C $\gamma$ <sup>-/-</sup> chickens' primers were designed to detect the TCR C $\gamma$ <sup>-/-</sup> knockout: Forward: 5' GCCATTCTATTCCCATCCTAAGT 3'; Reverse: 5' GGTTCGAAATGACCGACCAAGC 3'. A second primer pair was used to detect the wild type constant region of the TCR  $\gamma$  chain: Forward: 5' GAGCTCCACGCCATGAAACCATAG 3'; Reverse: 5' GTTGTCCTGTCACTGGCTG 3'. FIREPol Multiplex DNA Polymerase Mastermix (Solis Biodyne, Tartu, Estonia) was used according to manufactures instructions with an annealing temperature of T<sub>m</sub> 60°C.

### **Flow cytometry:**

PBMCs were isolated using histopaque density gradient centrifugation (Sigma, Taufkirchen, Germany). 1×10<sup>6</sup> cells were used per sample and washed with 1% BSA in PBS + 0,01% NaN<sub>3</sub>. Cells were first washed and then stained with primary antibodies (Table S1) for 20 min in the dark on ice. Subsequently, cells were washed and incubated with secondary antibodies (Table S1) for 20 min in the dark on ice. Thereafter cells were again washed and analyzed using an AttuneNXT flow cytometer (LifeTechnologies, Carlsbad, USA). Data were analyzed with FlowJo 10.8.1 software (FlowJo, Ashland, USA). For the FACS analysis of organs, the organ was strained through a 100 $\mu$ m cell strainer into a falcon holding 5mL PBS. The single cell solution was then further processed as described above.

### **ELISA:**

ELISA was performed as described before (13). Used antibodies are listed in Table S4. OD was measured at 450 nm with FluoStar Omega (Version 5.70 R2 BMG LABTECH, Ortenberg, Germany).

### **Histology:**

Tissue was frozen at -80°C in O.C.T. Tissue Tek Compound (Thermo Fisher Scientific, Waltham, USA). Before sectioning the tissue was stored overnight at -20°C. 7-8 $\mu$ m sections were prepared. For H&E Histology sections were stained with Mayer's hematoxyline (Meditate, Burgdorf, Germany) followed by Eosin (Meditate, Burgdorf, Germany). For mounting VectaMount Express Mounting Medium (Biozol, Eching, Germany) was used. Slides were scanned using a Precipoint Microscope. (Version 1.0.0.9628 PreciPoint, Freising, Germany)

For immunohistology, sections were stained with the antibodies listed in Table S2. Antibodies were detected using the Vectastain ABC Peroxidase Kit (Biozol, Eching, Germany) followed by the Vector DAB Kit (Biozol, Eching, Germany). Sections were counterstained with Mayer's hematoxyline (Meditate, Burgdorf, Germany). For mounting VectaMount Express Mounting Medium (Biozol, Eching, Germany) was used. Slides were scanned using Precipoint Microscope. (Version 1.0.0.9628). For fluorescence histology, sections were stained with the following antibodies shown in Table S3. Cell nuclei were stained with 0,01% DAPI (Applichem, Darmstadt, Deutschland). Vectashield Mounting Medium (Biozol, Eching, Germany) was used to mount the stained sections. Images were taken using an ECHO Revolve Microscope. (Revolve Software Version 4.0.5 Discover Echo Inc., San Diego, USA)

### **RNA extraction:**

Bursa, spleen, and thymus were collected 14 days post hatch. Samples were frozen in RNAlater (Sigma, Taufkirchen, Germany) at -20° until further processing. After defrosting samples were rinsed with PBS and homogenized using a SpeedMill Homogenisator (Analytik Jena, Jena, Germany) for 6x 60 seconds. Thereafter the

samples were processed according to the Manufacturer's Protocol for ReliaPrep RNA Tissue Miniprep System (Promega, Fitchburg, USA). PBMCs were isolated using histopaque density gradient centrifugation (Sigma, Taufkirchen, Germany). Further processing was according to the Manufacturer Protocol using ReliaPrep RNA Cell Miniprep System (Promega, Fitchburg USA). RNA integrity was analyzed using an Agilent 2100 Bioanalyzer (Agilent Technologies, Santa Clara, USA). Only RNA with a RIN  $\geq 7,5$  was used for downstream analysis.

#### **cDNA Synthesis:**

Using Go Script cDNA Kit (Promega, Fitchburg USA) RNA samples were processed according to the manufacturer's protocol.

#### **qRT-PCR:**

Primers (Table S5) were adapted from literature or designed using Benchling (San Francisco, USA). Promega GoTaq qRT-PCR kit (Promega, Fitchburg USA) was used according to the manufacturer's instructions. Expression was measured using QuantStudio5 (QuantStudio™ Design&analysis Software v1.5.2, Thermo Fisher Scientific, Waltham, USA)

#### **Morphometry:**

Sections from duodenum, jejunum, ileum, and caecum were taken from TCR  $C\gamma^{-/-}$  ( $n \geq 3$ ) and wild type chickens ( $n \geq 5$ ) 35 days after hatch and frozen in O.C.T. Tissue Tek Compound (Thermo Fisher, Waltham, USA) at  $-80^{\circ}\text{C}$ . Before cutting, the tissue was stored overnight at  $-20^{\circ}\text{C}$ . 7-8 $\mu\text{m}$  sections were prepared. H&E Stain was performed as described above. Measurements were done with the Precipoint Microscope (Version 1.0.0.9628 PreciPoint, Freising, Germany). From each slide, the longest villus and the corresponding crypt were measured and for the Tunica muscularis 4 sites were measured. At least 3 sections per organ and animal were prepared.

#### **Microbiome analysis:**

Feces was taken from 14-day-old TCR  $C\beta^{-/-}$  chicken and wild type chickens. The feces were collected using a sterile spoon attached to a fecal tube. Feces samples were stored in 1 mL of Stool Stabilizer (Invitek, Berlin, Germany). Caecum content was taken from TCR  $C\beta^{-/-}$  animals after 14 days and from TCR  $C\gamma^{-/-}$  animals after 35 days both compared to wild type. Caecum content was flushed into a tube holding 1 mL Stool Stabilizer (Invitek, Berlin, Germany). From all samples, DNA was extracted and processed as previously described (28).

#### **Statistical analysis:**

Statistical analyses were performed using SPSS statistics software (version 28.0.1.1. IBM, Armonk, USA). Normally distributed data (Shapiro-Wilk test  $p < 0.05$ ) were analyzed by student's T-Test and Mann-Whitney-U Test was applied for not normally distributed data. All P-values  $< 0.05$  were marked as significant. Graphs were designed with GraphPad Prism (Version 9.3.1. Dotmatics, Boston, USA). Statistics of the microbiome analysis were performed using Wilcoxon-Rank-Sum Pairwise test.

#### **Acknowledgements and funding sources:**

#### **Data availability statement:**

The data that supports the findings of this study is available from the corresponding author upon reasonable request. Raw data for the microbiome analysis are available on SRA (Accession Number: PRJNA934268).

**Conflict of interest disclosure:**

The authors declare no financial or commercial conflict of interest.

**Ethics approval statement for human and/or animal studies:**

All animal work was conducted according to relevant national and international guidelines for humane use of animals. Animal experiments were approved by the government of Upper Bavaria, Germany (ROB-55.2-2532.Vet\_02-17-101 & 55.2-1-54-2532-104-2015).

**Author contributions:**

TvH performed and analyzed the experiments and wrote the paper. BS supervised the work and wrote the paper. HS performed experiments and wrote the paper. MA planned experiments and wrote the paper. RK, CZ, DA, AS, KL, H-KV, and TM performed experiments. All authors approved the submitted version.

**Acknowledgment:**

This project was funded by the Deutsche Forschungsgemeinschaft (DFG, German Research Foundation) in the framework of the Research Unit ImmunoChick (FOR5130) project SCHU 2446/6-1 (awarded to BS) and an Emmy-Noether research fellowship (DFG Schu2446/3-1 awarded to BS). We thank Bernd Kaspers, Department of Animal Sciences, Ludwig-Maximilians University Munich for his valuable advises. Also, we thank Silvia Mitterer, Chair of Anatomy, Histology and Embryology, Ludwig-Maximilians University Munich for help with the histology. The anti-GRL1 antibody developed by Thomas, J.-L was obtained from the Developmental Studies Hybridoma Bank, created by the NICHD of the NIH and maintained at The University of Iowa, Department of Biology, Iowa City, IA 52242.

## References:

1. M. D. Cooper, M. N. Alder, The evolution of adaptive immune systems. *Cell* **124**, 815-822 (2006).
2. J. Holderness, J. F. Hedges, A. Ramstead, M. A. Jutila, Comparative biology of gammadelta T cell function in humans, mice, and domestic animals. *Annu Rev Anim Biosci* **1**, 99-124 (2013).
3. L. Fenzl, T. W. Gobel, M. L. Neulen, gammadelta T cells represent a major spontaneously cytotoxic cell population in the chicken. *Dev Comp Immunol* **73**, 175-183 (2017).
4. A. Berndt, J. Pieper, U. Methner, Circulating gamma delta T cells in response to *Salmonella enterica* serovar enteritidis exposure in chickens. *Infect Immun* **74**, 3967-3978 (2006).
5. J. T. Sowder, C. L. Chen, L. L. Ager, M. M. Chan, M. D. Cooper, A large subpopulation of avian T cells express a homologue of the mammalian T gamma/delta receptor. *J Exp Med* **167**, 315-322 (1988).
6. K. A. Schat, Cell-mediated immune effector functions in chickens. *Poult Sci* **73**, 1077-1081 (1994).
7. N. B. Burkhardt *et al.*, The Discovery of Chicken Foxp3 Demands Redefinition of Avian Regulatory T Cells. *J Immunol* **208**, 1128-1138 (2022).
8. J. D. Fontenot, M. A. Gavin, A. Y. Rudensky, Foxp3 programs the development and function of CD4<sup>+</sup>CD25<sup>+</sup> regulatory T cells. *Nat Immunol* **4**, 330-336 (2003).
9. M. Luhtala, Chicken CD4, CD8 $\alpha$ beta, and CD8 $\alpha$ alpha T cell co-receptor molecules. *Poult Sci* **77**, 1858-1873 (1998).
10. J. Cihak *et al.*, In vivo depletion of chicken T-cell subsets. *Scand J Immunol* **38**, 123-129 (1993).
11. K. Y. Lee *et al.*, Development and characterization of a CRISPR/Cas9-mediated. *Front Immunol* **13**, 892476 (2022).
12. B. Schusser *et al.*, Immunoglobulin knockout chickens via efficient homologous recombination in primordial germ cells. *Proc Natl Acad Sci U S A* **110**, 20170-20175 (2013).
13. B. Schusser *et al.*, Expression of heavy chain-only antibodies can support B-cell development in light chain knockout chickens. *Eur J Immunol* **46**, 2137-2148 (2016).
14. L. Dimitrov *et al.*, Germline Gene Editing in Chickens by Efficient CRISPR-Mediated Homologous Recombination in Primordial Germ Cells. *PLoS One* **11**, e0154303 (2016).
15. Y. Chen, K. Chou, E. Fuchs, W. L. Havran, R. Boismenu, Protection of the intestinal mucosa by intraepithelial gamma delta T cells. *Proc Natl Acad Sci U S A* **99**, 14338-14343 (2002).
16. I. Sandrock *et al.*, Genetic models reveal origin, persistence and non-redundant functions of IL-17-producing gammadelta T cells. *J Exp Med* **215**, 3006-3018 (2018).
17. L. Dianda *et al.*, T cell receptor-alpha beta-deficient mice fail to develop colitis in the absence of a microbial environment. *Am J Pathol* **150**, 91-97 (1997).
18. M. J. Bosma, The scid mutation: occurrence and effect. *Curr Top Microbiol Immunol* **152**, 3-9 (1989).
19. T. P. Arstila, O. Vainio, O. Lassila, Central role of CD4<sup>+</sup> T cells in avian immune response. *Poult Sci* **73**, 1019-1026 (1994).

20. I. Raphael, S. Nalawade, T. N. Eagar, T. G. Forsthuber, T cell subsets and their signature cytokines in autoimmune and inflammatory diseases. *Cytokine* **74**, 5-17 (2015).
21. S. Kim *et al.*, Molecular characterization and immunological roles of avian IL-22 and its soluble receptor IL-22 binding protein. *Cytokine* **60**, 815-827 (2012).
22. G. F. Sonnenberg, L. A. Fouser, D. Artis, Border patrol: regulation of immunity, inflammation and tissue homeostasis at barrier surfaces by IL-22. *Nat Immunol* **12**, 383-390 (2011).
23. A. Berndt, U. Methner, Gamma/delta T cell response of chickens after oral administration of attenuated and non-attenuated *Salmonella typhimurium* strains. *Vet Immunol Immunopathol* **78**, 143-161 (2001).
24. Y. Parel, C. Chizzolini, CD4+ CD8+ double positive (DP) T cells in health and disease. *Autoimmun Rev* **3**, 215-220 (2004).
25. H. Neves, E. Dupin, L. Parreira, N. M. Le Douarin, Modulation of Bmp4 signalling in the epithelial-mesenchymal interactions that take place in early thymus and parathyroid development in avian embryos. *Dev Biol* **361**, 208-219 (2012).
26. R. P. Bucy, C. H. Chen, M. D. Cooper, Ontogeny of T cell receptors in the chicken thymus. *J Immunol* **144**, 1161-1168 (1990).
27. M. H. Kogut, A. Lee, E. Santin, Microbiome and pathogen interaction with the immune system. *Poult Sci* **99**, 1906-1913 (2020).
28. I. Abellan-Schneyder *et al.*, Primer, Pipelines, Parameters: Issues in 16S rRNA Gene Sequencing. *mSphere* **6** (2021).

## Figure legends:

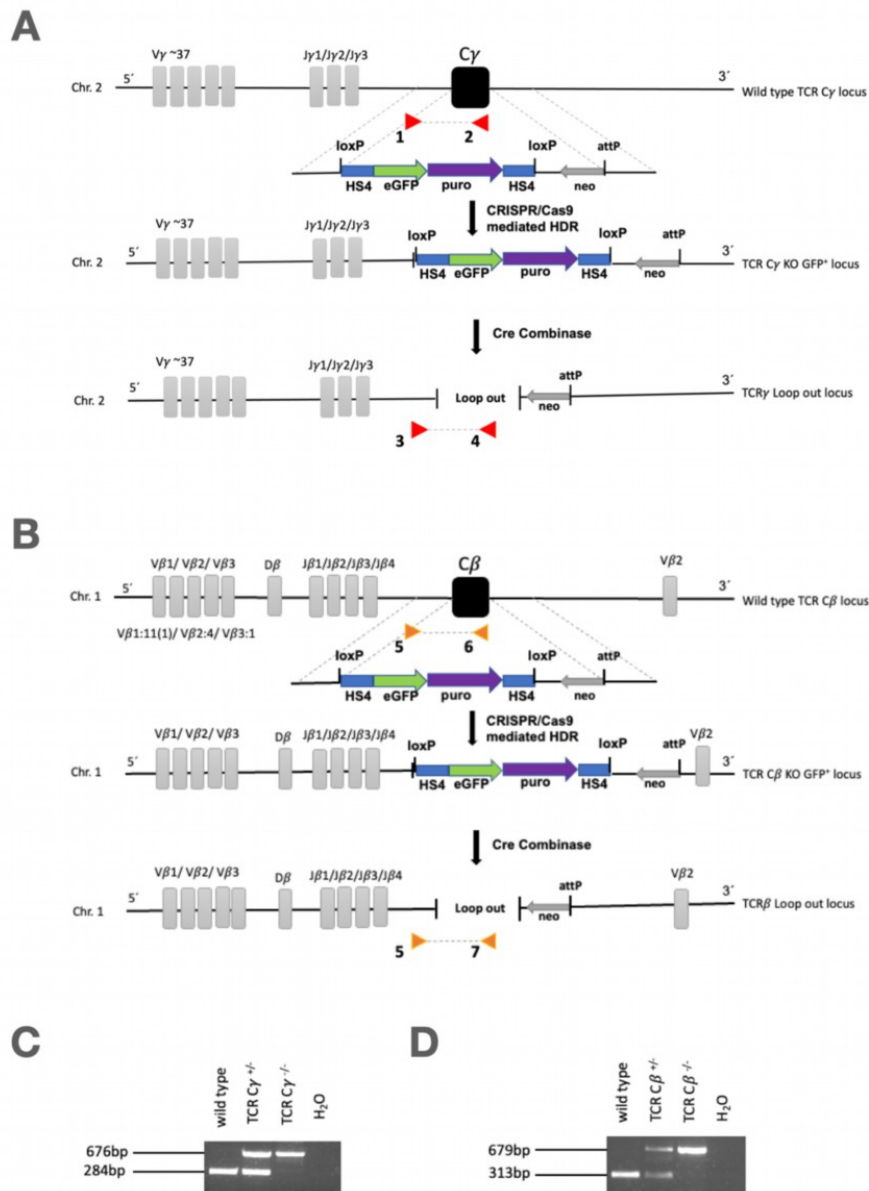

Fig. 1: Generation of the TCR  $C\beta^{-/-}$  and TCR  $C\gamma^{-/-}$  knockout animals. (A) The establishment of a  $\gamma\delta$  T cell deficient chicken line was achieved by targeting the constant region of the TCR  $\gamma$  chain on chromosome 2. The targeting vector contained a selectable marker cassette (eGFP + puromycin resistance gene) to allow the selection of successfully targeted cells. Cre-mediated recombination resulted in the removal of the selectable markers. (B) The establishment of an  $\alpha\beta$  T cell deficient chicken line was achieved by targeting the constant region of the TCR  $\beta$  chain on chromosome 1. The same targeting strategy as shown for the TCR  $\gamma$  chain was used. (C) Genotyping of TCR  $C\gamma^{-/-}$  chicken by multiplex PCR. Wild type allele-specific primers (#1 and #2) with an amplicon length of 284bp and TCR  $C\gamma$  knockout-specific primers (#3 and #4) with an amplicon length of 676bp were used. (D) Genotyping of TCR  $C\beta^{-/-}$  chicken by multiplex PCR. Wild type allele-specific primers (#5 and #6) with an amplicon length of 313bp and TCR  $C\beta$  KO-specific primers (#5 and #7) with an amplicon length of 679bp were used.

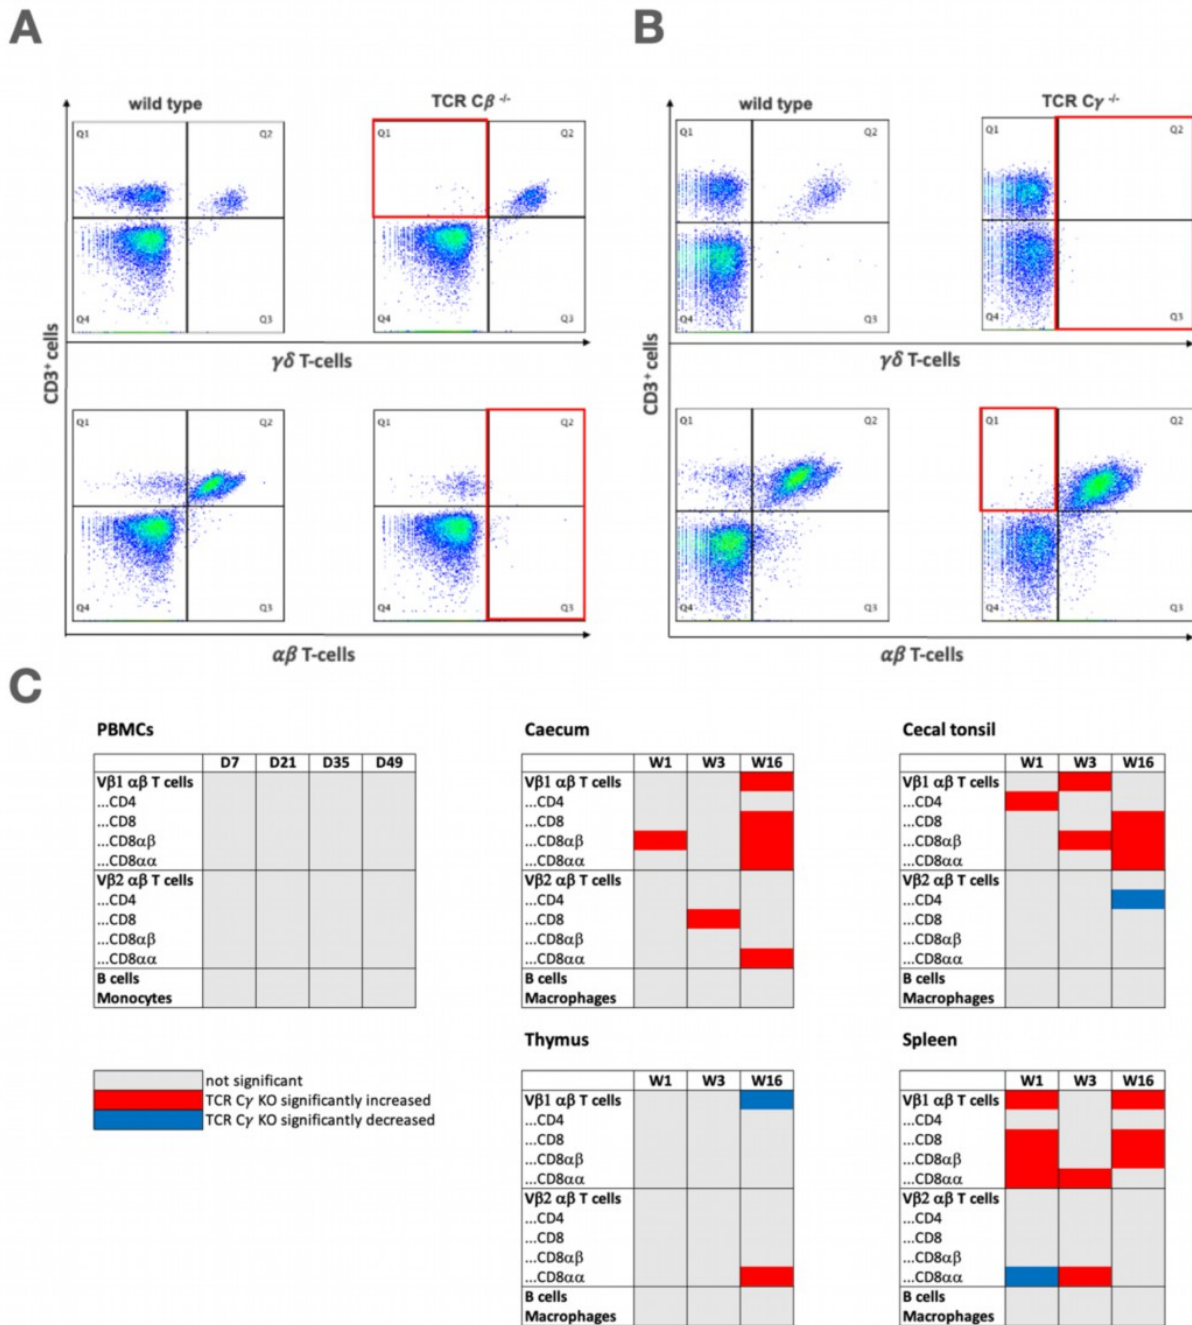

Fig. 2:(A) One representative dot plot of wild type against TCR  $C\beta^{-/-}$  (day 14; n=10) and (B) wild type against TCR  $C\gamma^{-/-}$  knockout chickens (day 24; n=3) is shown. PBMCs were stained for the T cell marker CD3 and  $\gamma\delta$  T cells (TCR1) or  $\alpha\beta$  T cells (TCR2 + TCR3). (C) Analysis of TCR2 subsets, TCR3 subsets, B cells, and macrophages at day (D) 7, 21, 35, and 49 from PBMCs and mononuclear cells isolated from thymus, spleen, caecum and cecal tonsils at week (W) 1, 3, and 16 of TCR  $C\gamma^{-/-}$  knockout chickens (n=4).  $p < 0.05$

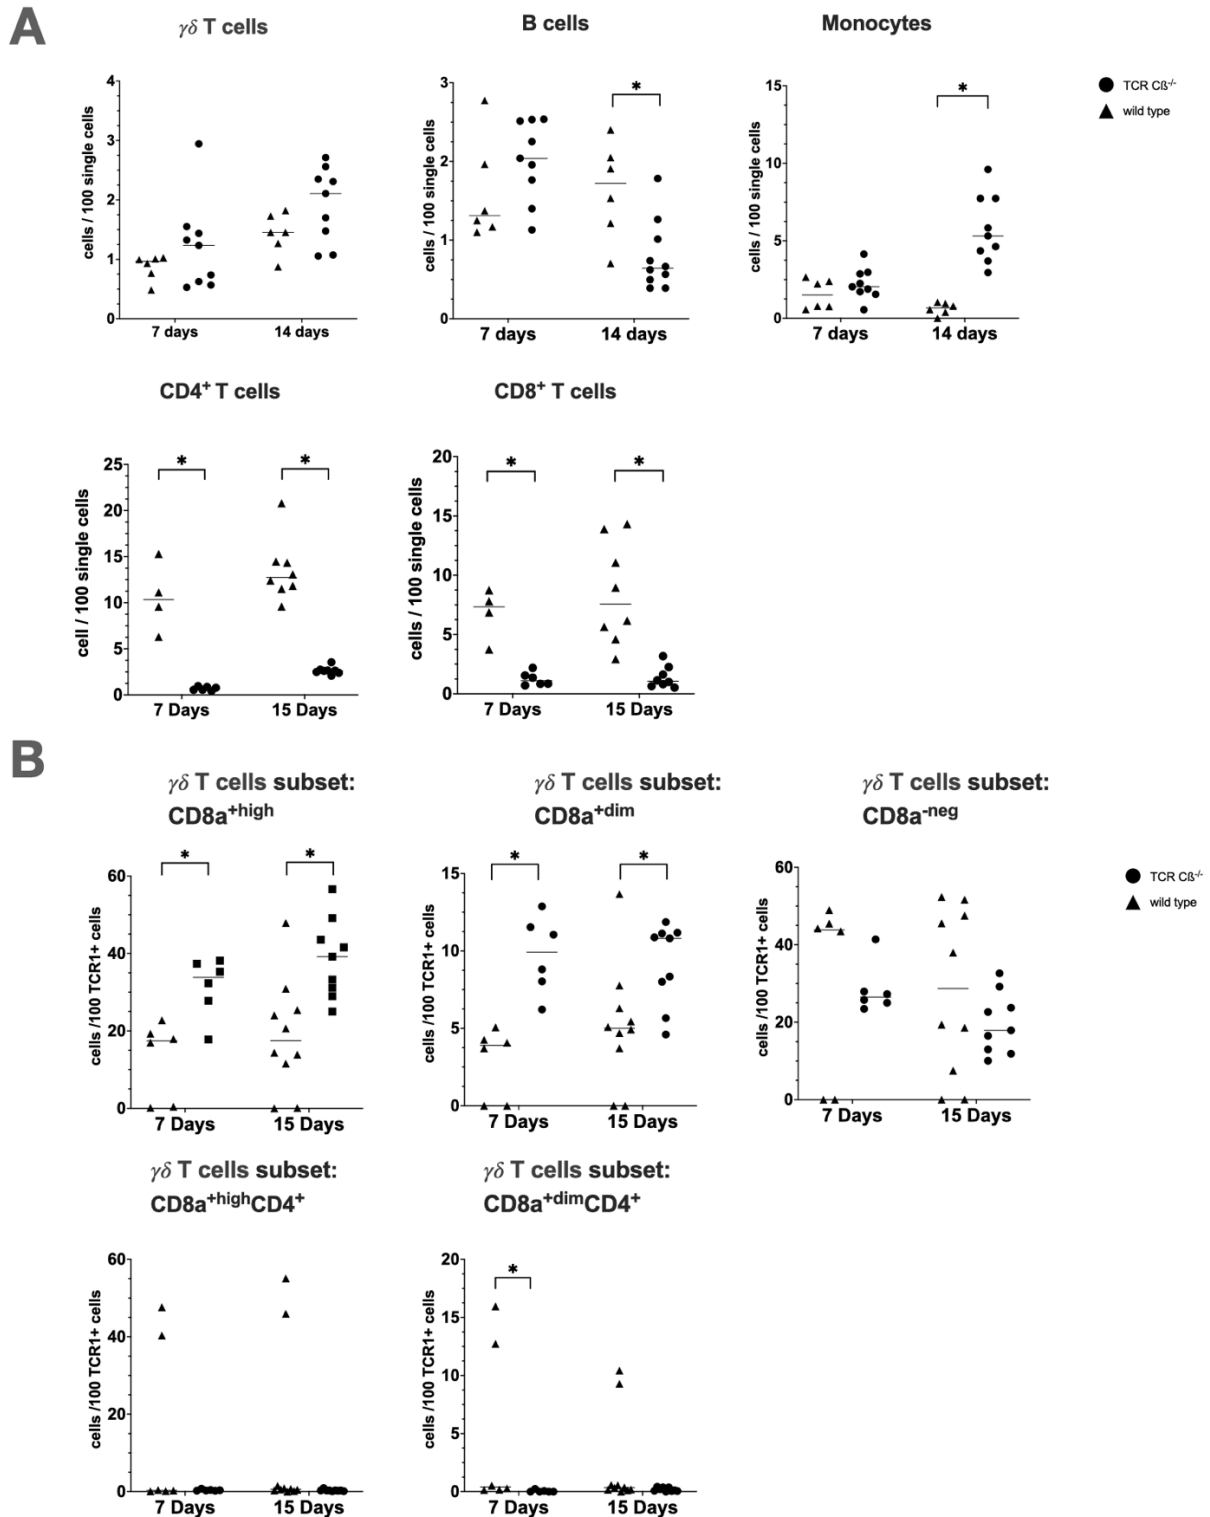



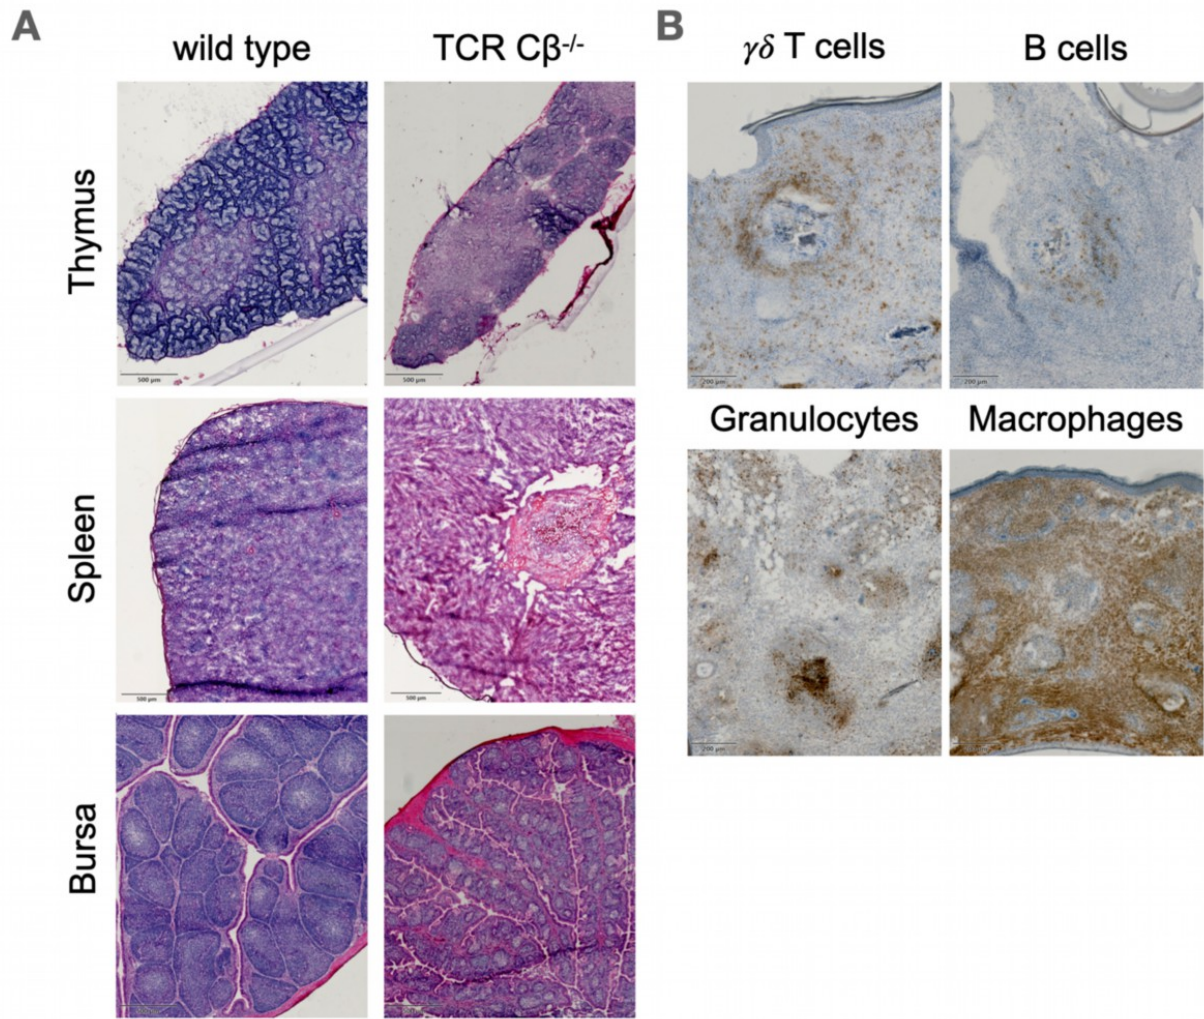

Fig. 4: (A) Sections of thymus, spleen, and bursa of 14-day-old wild type and TCR  $C\beta^{-/-}$  chicken have been prepared and stained with H&E. (B) Skin granulomas of 14-day-old wild type and TCR  $C\beta^{-/-}$  chicken have been dissected and stained for  $\gamma\delta$  T cells (TCR1), B cells (BU1/AV20), granulocytes (GRL1) and macrophages (Kul01). Always one representative picture of at least three different animals per genotype is shown. Scale bar (A) = 500 $\mu\text{m}$  (B) = 200 $\mu\text{m}$ .
